# Supplementary material for: Na2B10O17·H2en: a three-dimensional open-framework layered borate co-templated by inorganic cations and organic amines
Source: Royal Society of Chemistry journal article supplement (doi:10.1039/c5cc00800j), 2015-01-01
Supplement: c5cc00800j1.pdf [file c5cc00800j1.pdf]

## *Supporting Information*

### **Na<sub>2</sub>B<sub>10</sub>O<sub>17</sub>·H<sub>2</sub>en: A three-dimensional open-framework layered borate co-templated by inorganic cations and organic amines**

*Jun-Hua Wang,<sup>a</sup> Qi Wei,<sup>c</sup> Jian-Wen Cheng,<sup>b,\*</sup> Huan He,<sup>a</sup> Bai-Feng Yang,<sup>a</sup> and Guo-Yu Yang,<sup>a,\*</sup>*

*<sup>a</sup>MOE Key Laboratory of Cluster Science, School of Chemistry, Beijing Institute of Technology, Beijing 100083 (China). E-mail: ygy@bit.edu.cn; ygy@fjirsm.ac.cn*

*<sup>b</sup>Key Laboratory of the Ministry of Education for Advanced Catalysis Materials, Institute of Physical Chemistry, Zhejiang Normal University, Jinhua, Zhejiang 321004 (China). E-mail: jwcheng@zjnu.cn*

*<sup>c</sup>State Key Laboratory of Structural Chemistry, Fujian Institute of Research on the Structure of Matter, Chinese Academy of Sciences, Fuzhou, Fujian 350002(China).*

**Table S1.** X-ray crystallographic data for **1**.

**Table S2.** Selected bond lengths (Å) and bond valence sum (BVS) calculations for compound **1**.

**Figure S1.** The experimental and simulated PXRD patterns of **1**.

**Figure S2.** The pore size of the 9-,10- and 13-MR (the distance between two O atoms).

**Figure S3.** IR spectrum of **1**.

**Figure S4.** TG curve of compound **1** under air atmosphere (10 °C/min).

**Figure S5.** UV diffuse reflectance spectrum of **1**.

**Table S1.** X-ray crystallographic data for **1**.

|                                       |                                                                                               |
|---------------------------------------|-----------------------------------------------------------------------------------------------|
| Empirical formula                     | C <sub>2</sub> H <sub>10</sub> B <sub>10</sub> N <sub>2</sub> Na <sub>2</sub> O <sub>17</sub> |
| $M_r$                                 | 488.20                                                                                        |
| crystal system                        | monoclinic                                                                                    |
| space group                           | <i>C2/c</i>                                                                                   |
| $a$ (Å)                               | 21.9507(10)                                                                                   |
| $b$ (Å)                               | 6.4172(2)                                                                                     |
| $c$ (Å)                               | 11.0598(5)                                                                                    |
| $\beta$ (°)                           | 103.407(4)                                                                                    |
| $V$ (Å <sup>3</sup> )                 | 1515.45(11)                                                                                   |
| $Z$                                   | 4                                                                                             |
| $D_c$ (g cm <sup>-3</sup> )           | 2.140                                                                                         |
| $\mu$ (mm <sup>-1</sup> )             | 0.243                                                                                         |
| $F(000)$                              | 976                                                                                           |
| crystal size (mm)                     | 0.30 × 0.25 × 0.25                                                                            |
| index ranges                          | 3.31-25.19                                                                                    |
| $GOF$                                 | 1.075                                                                                         |
| collected reflcns                     | 3220                                                                                          |
| unique reflcns ( $R_{int}$ )          | 1369 (0.0264)                                                                                 |
| observed reflcns [ $I > 2\sigma(I)$ ] | 1180                                                                                          |
| refined parameters                    | 150                                                                                           |
| $R_1^a/wR_2^b$ [ $I > 2\sigma(I)$ ]   | 0.0326/ 0.0802                                                                                |
| $R_1^a/wR_2^b$ (all data)             | 0.0391/ 0.0828                                                                                |
| largest difference peak/hole          | 0.302/ -0.364                                                                                 |

$$^aR_1 = \frac{\sum ||F_o| - |F_c||}{\sum |F_o|}, \quad ^b wR_2 = \left\{ \frac{\sum [w(F_o^2 - F_c^2)^2]}{\sum [w(F_o^2)^2]} \right\}^{1/2}.$$

**Table S2.** Selected bond lengths (Å) and bond valence sum (BVS) calculations for compound **1**<sup>a</sup>.

| Bond       | Distance (Å) | BVS   | BVS (Sum) | Bond        | Distance (Å) | BVS   | BVS (Sum) |
|------------|--------------|-------|-----------|-------------|--------------|-------|-----------|
| B(1)-O(8)  | 1.356(3)     | 1.027 | 3.012     | B(5)-O(3)   | 1.354(3)     | 1.033 | 2.990     |
| B(1)-O(4)  | 1.358(3)     | 1.022 |           | B(5)-O(7)   | 1.358(3)     | 1.022 |           |
| B(1)-O(9)  | 1.380(2)     | 0.963 |           | B(5)-O(6)   | 1.391(3)     | 0.935 |           |
| B(2)-O(1)  | 1.432(3)     | 0.837 | 2.940     | Na(1)-O(1D) | 2.3154(16)   | 0.226 | 1.119     |
| B(2)-O(2)  | 1.480(3)     | 0.735 |           | Na(1)-O(7A) | 2.5005(16)   | 0.148 |           |
| B(2)-O(8)  | 1.498(3)     | 0.670 |           | Na(1)-O(5)  | 2.5284(16)   | 0.139 |           |
| B(2)-O(3)  | 1.499(3)     | 0.698 |           | Na(1)-O(6C) | 2.5352(17)   | 0.137 |           |
| B(3)-O(1)  | 1.438(3)     | 0.823 | 2.991     | Na(1)-O(2D) | 2.5794(16)   | 0.124 |           |
| B(3)-O(7A) | 1.475(3)     | 0.745 |           | Na(1)-O(2E) | 2.8195(16)   | 0.072 |           |
| B(3)-O(5B) | 1.481(3)     | 0.732 |           | Na(1)-O(1)  | 2.3681(16)   | 0.200 |           |
| B(3)-O(4)  | 1.503(3)     | 0.691 |           | Na(1)-O(3)  | 2.8156(17)   | 0.073 |           |
| B(4)-O(5)  | 1.358(3)     | 1.022 | 2.976     | C(1)-N(1)   | 1.475(3)     |       |           |
| B(4)-O(2)  | 1.361(3)     | 1.014 |           | C(1)-C(1F)  | 1.523(4)     |       |           |
| B(4)-O(6)  | 1.389(3)     | 0.940 |           |             |              |       |           |

<sup>a</sup>Symmetry codes: A:  $x, -y + 1, z + 1/2$ ; B:  $x, -y, z + 1/2$ ; C:  $-x + 1/2, -y + 1/2, -z + 1$ ; D:  $-x + 1/2, y + 1/2, -z + 3/2$ ; E:  $x, y + 1, z$ ; F:  $-x, -y + 1, -z + 1$ .

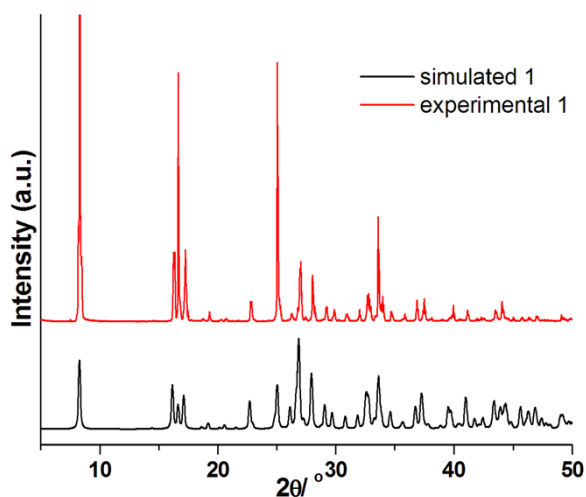**Figure S1.** The experimental and simulated PXRD patterns of **1**.

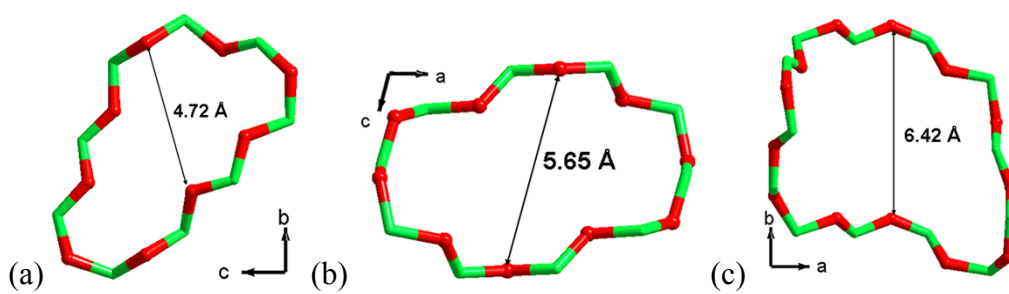

**Figure S2.** The pore size of the 9-,10- and 13-MR (the distance between two O atoms).

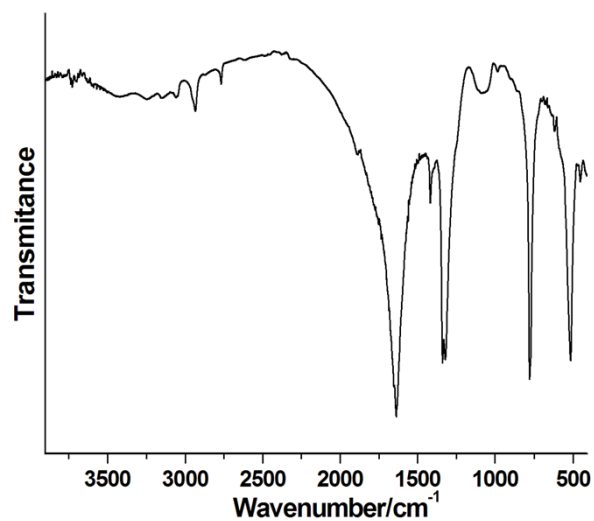

**Figure S3.** IR spectra of **1**.

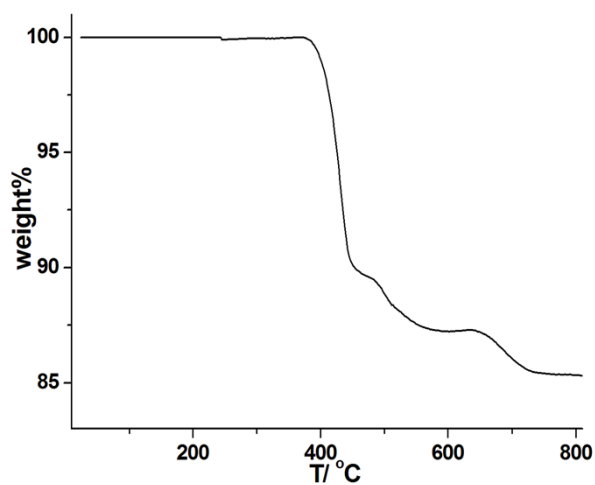

**Figure S4.** TG curve of compound **1** under air atmosphere (10 °C/min).

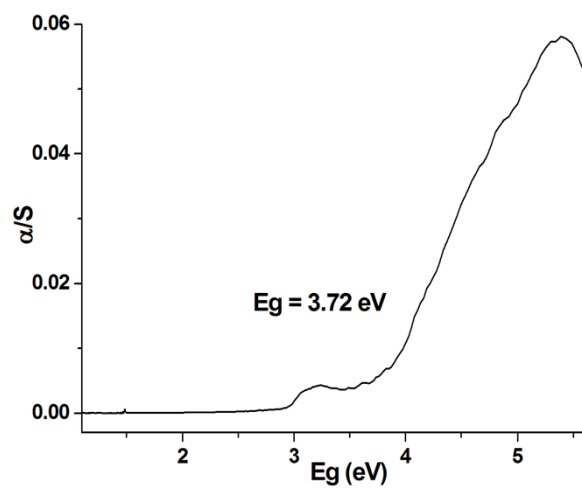

**Figure S5.** UV diffuse reflectance spectra of **1**.
